# Supplementary material for: Investigation of titania and ceria support effects in nickel catalyzed CO2 methanation
Source: Royal Society of Chemistry journal article supplement (doi:10.1039/d4cy00461b), 2024-01-01
Supplement: d4cy00461b2.pdf [file d4cy00461b2.pdf]

## **Supplemental Information**

### **Investigation of Titania and Ceria Support Effects in Nickel Catalyzed CO<sub>2</sub> Methanation**

Majed Alam Abir, Rachel E. Phillips, Joseph Z M. Harrah, Madelyn R. Ball  
Department of Chemical and Biomedical Engineering, West Virginia University, Morgantown, WV  
26506

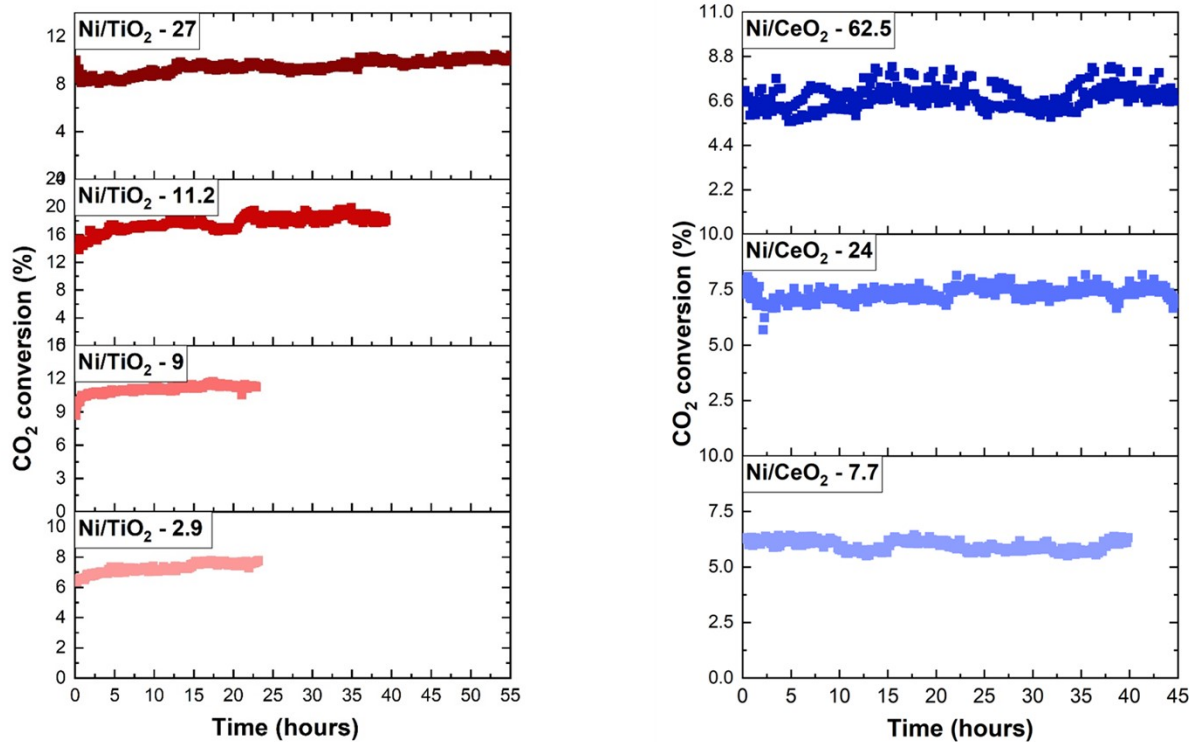

**Figure S1.** Stability plots of Ni-based catalysts studied in this work.

**Table S1.** Reactivity data of the catalysts studied in this work.

| Catalyst                  | Total flow rate (sccm) | Average CO <sub>2</sub> conversion (%) <sup>a</sup> | Average CH <sub>4</sub> Production (μmol/min/g Ni) <sup>a,b</sup> | Stable time range used to calculate average CO <sub>2</sub> conversion and CH <sub>4</sub> production (hrs.) <sup>a</sup> |
|---------------------------|------------------------|-----------------------------------------------------|-------------------------------------------------------------------|---------------------------------------------------------------------------------------------------------------------------|
| Ni/TiO <sub>2</sub> -2.9  | 100                    | 7.2±0.1                                             | 7779                                                              | 8-13 hrs.                                                                                                                 |
| Ni/TiO <sub>2</sub> -9    | 200                    | 11.1±0.1                                            | 13524                                                             | 10-15 hrs.                                                                                                                |
| Ni/TiO <sub>2</sub> -11.2 | 400                    | 18.2±0.4                                            | 48105                                                             | 23-28 hrs.                                                                                                                |
| Ni/TiO <sub>2</sub> -27   | 100                    | 10.1±0.1                                            | 7350                                                              | 50-55 hrs.                                                                                                                |
| Ni/CeO <sub>2</sub> -7.7  | 100                    | 5.8±0.1                                             | 9146                                                              | 25-30 hrs.                                                                                                                |
| Ni/CeO <sub>2</sub> -24   | 100                    | 7.6±0.2                                             | 6370                                                              | 21-26 hrs.                                                                                                                |
| Ni/CeO <sub>2</sub> -62.5 | 50                     | 7±0.4                                               | 2348                                                              | 40-45 hrs.                                                                                                                |

<sup>a</sup> Reaction conditions: 300 °C, 1 atm, CO<sub>2</sub>:H<sub>2</sub>:N<sub>2</sub> = 1:4:5. The reported CO<sub>2</sub> conversion and CH<sub>4</sub> production were calculated at the steady state activity after the activation period. <sup>b</sup> Average CH<sub>4</sub> production is based on ICP Ni loading.

**Table S2. Comparison of the reported materials against existing literature**

| Catalyst                          | Ni particle size (nm) | Reaction Temperature (°C) and Pressure (atm) | Maximum CH <sub>4</sub> selectivity (%) | TOF (s <sup>-1</sup> ) | Reference            |
|-----------------------------------|-----------------------|----------------------------------------------|-----------------------------------------|------------------------|----------------------|
| Ni/TiO <sub>2</sub>               | 2.9-27                | 300 °C, 1 atm                                | 100                                     | 0.02-0.53              | Studied in this work |
| Ni/CeO <sub>2</sub>               | 7.7-62.5              | 300 °C, 1 atm                                | 100                                     | 0.07-0.15              | Studied in this work |
| Ni/CeO <sub>2</sub>               | 2-8                   | 300 °C, 1 atm                                | 91                                      | 0.001-0.06             | <sup>48</sup>        |
| Ni/Al <sub>2</sub> O <sub>3</sub> | 11.41-16.98           | 400 °C, 1 atm                                | 50                                      | 1.32-2.02              | <sup>59</sup>        |
| Ni/Al <sub>2</sub> O <sub>3</sub> | 8.5                   | 250 °C, 1 atm                                | 32                                      | 0.007                  | <sup>60</sup>        |
| Ni/SiO <sub>2</sub>               | 3.5-7.5               | 250 °C, 1 atm                                | 93                                      | 0.001-0.004            | <sup>61</sup>        |
| Ni/SiO <sub>2</sub>               | 1.1-6.9               | 300 °C, 4.9 atm                              | 99.5                                    | 0.01-0.07              | <sup>44</sup>        |
| Ni/SiO <sub>2</sub>               | 2.7-12.2              | 220 °C, 1 atm                                | 90                                      | 0.001-0.002            | <sup>62</sup>        |

### Absence of transport limitations:

We calculate the Weisz-Prater (W-P) criterion to confirm the absence of transport limitations.<sup>1</sup> The Weisz-Prater Criterion is defined as

$$N_{W-P} = \frac{R_p^2 r_{obs}}{D_{eff} C_S}$$

Where  $r_{obs}$  is the rate per catalyst volume,  $R_p$  is the radius of the catalyst particle,  $C_S$  is the concentration of reactants ( $CO_2$  and  $H_2$ ) at the catalyst surface, and  $D_{eff}$  is the effective diffusivity considered for both  $CO_2$  and  $H_2$  molecule separately.

The parameters used in the case of the catalyst studied in this work are provided in Table S2 and the W-P criteria for all catalysts are shown in Table S3.

**Table S3.** Parameters used in calculation of the W-P criterion.

| Parameter                                                               | Value                  |
|-------------------------------------------------------------------------|------------------------|
| Catalyst particle radius ( $R_p$ ) (cm) <sup>a</sup>                    | 0.021                  |
| Specific reactor volume ( $V_s$ ) ( $cm^3 g_{cat}^{-1}$ )               | 3.68                   |
| Average velocity for the $CO_2$ molecules ( $\bar{v}$ ) ( $cm s^{-1}$ ) | $5.25 \times 10^4$     |
| Mean free path ( $\lambda$ ) (cm) for $CO_2$ molecule                   | $5.07 \times 10^{-5}$  |
| Molecular diameter of $CO_2$ ( $\sigma$ ) (cm)                          | $3.3 \times 10^{-8}$   |
| Average velocity for the $H_2$ molecules ( $\bar{v}$ ) ( $cm s^{-1}$ )  | $2.5 \times 10^5$      |
| Mean free path ( $\lambda$ ) (cm) for $H_2$ molecule                    | $3.1 \times 10^{-5}$   |
| Molecular diameter of $H_2$ ( $\sigma$ ) (cm)                           | $2.4 \times 10^{-8}$   |
| Reaction Temperature (T)(K)                                             | 573                    |
| Gas constant (R) ( $atm cm^3 g_{mole}^{-1} K$ )                         | 82.06                  |
| Boltzmann constant ( $k_B$ ) ( $erg K^{-1}$ )                           | $1.38 \times 10^{-16}$ |

<sup>a</sup> For all catalysts, the particles passed through a 40-mesh screen, which represents a 0.042 cm opening and a maximum radius of  $R_p=0.021$  cm.

**Table S4.** W-P Criterion for the catalysts studied in this work.

| Catalyst                  | $r^{obs}$<br>(mol/s/gcm <sup>3</sup> ) | $N_{W-P}$ for CO <sub>2</sub> | $N_{W-P}$ for H <sub>2</sub> |
|---------------------------|----------------------------------------|-------------------------------|------------------------------|
| Ni/TiO <sub>2</sub> -2.9  | $5.57 \times 10^{-7}$                  | $2.64 \times 10^{-3}$         | $1.39 \times 10^{-4}$        |
| Ni/TiO <sub>2</sub> -9    | $1.63 \times 10^{-6}$                  | $7.71 \times 10^{-3}$         | $4.06 \times 10^{-4}$        |
| Ni/TiO <sub>2</sub> -11.2 | $5.82 \times 10^{-6}$                  | $2.75 \times 10^{-2}$         | $1.45 \times 10^{-3}$        |
| Ni/TiO <sub>2</sub> -27   | $8.19 \times 10^{-7}$                  | $3.88 \times 10^{-3}$         | $2.04 \times 10^{-4}$        |
| Ni/CeO <sub>2</sub> -7.7  | $4.27 \times 10^{-7}$                  | $5.05 \times 10^{-3}$         | $2.66 \times 10^{-4}$        |
| Ni/CeO <sub>2</sub> -24   | $6.09 \times 10^{-7}$                  | $7.21 \times 10^{-3}$         | $3.79 \times 10^{-4}$        |
| Ni/CeO <sub>2</sub> -62.5 | $2.94 \times 10^{-7}$                  | $3.48 \times 10^{-3}$         | $1.83 \times 10^{-4}$        |

The Weisz-Prater number,  $N_{W-P}$  (for CO<sub>2</sub> and H<sub>2</sub> separately) indicates negligible diffusional limitations when  $N_{W-P} \leq 0.3$ . All reactions conducted in this work are not limited by transport effects.

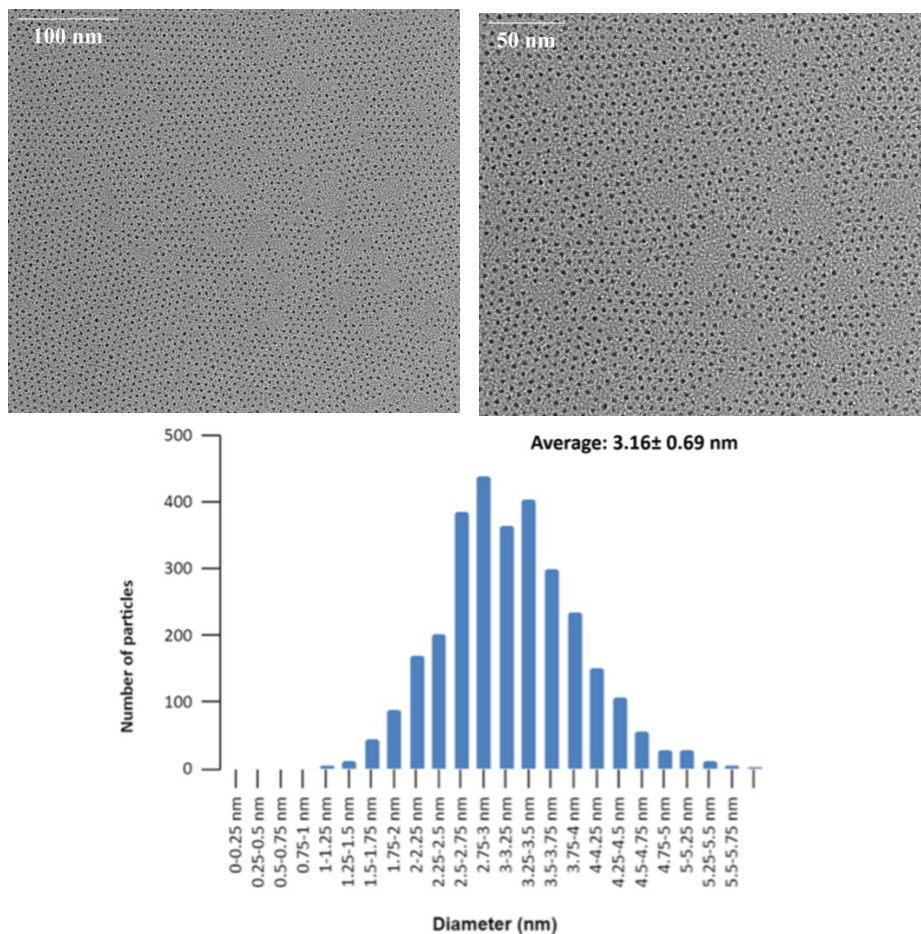

**Figure S2.** TEM images of the colloidal nickel nanoparticles in solution, and the corresponding particle size distribution. We note that all supported colloidal catalysts were prepared from this same batch of Ni nanoparticles.

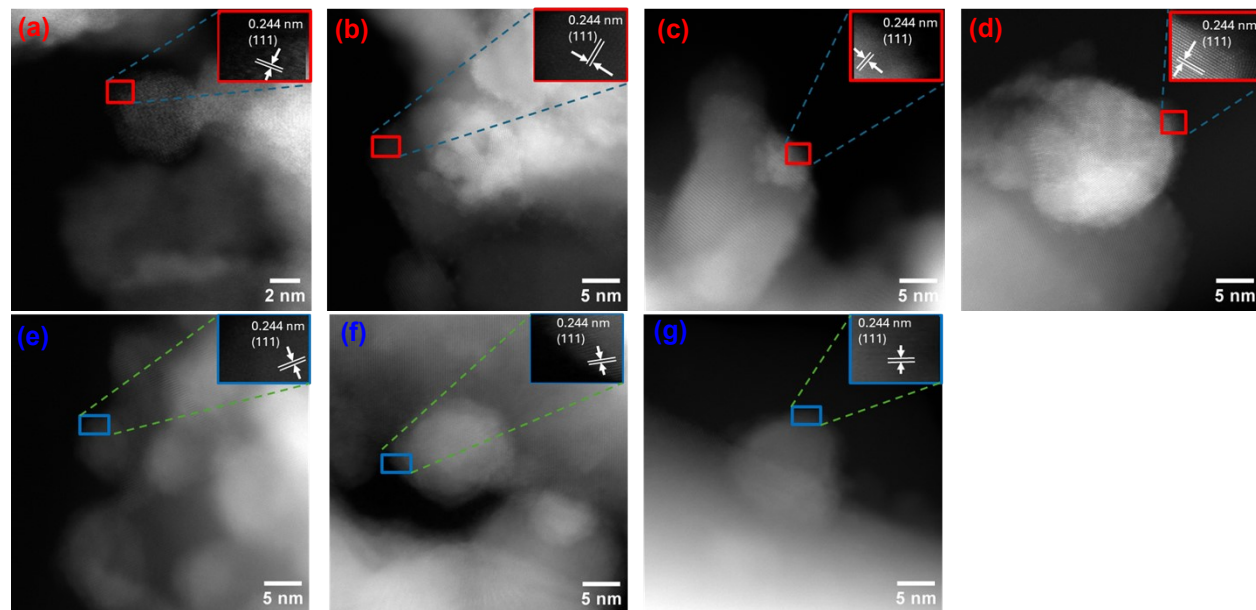

**Figure S3. Absence of SMSI of the catalysts studied in this work.** a) Ni/TiO<sub>2</sub> - 2.9, b) Ni/TiO<sub>2</sub> -9, c) Ni/TiO<sub>2</sub> - 11.2, d) Ni/TiO<sub>2</sub> - 27, e) Ni/CeO<sub>2</sub> - 7.7, e) Ni/CeO<sub>2</sub> - 24, f) Ni/CeO<sub>2</sub> - 62.5. The boxes (red for Ni/TiO<sub>2</sub> and blue for Ni/CeO<sub>2</sub>) indicate the region where the possibilities of formation of SMSI layer. (d spacing for NiO (111) is 0.244 nm.)

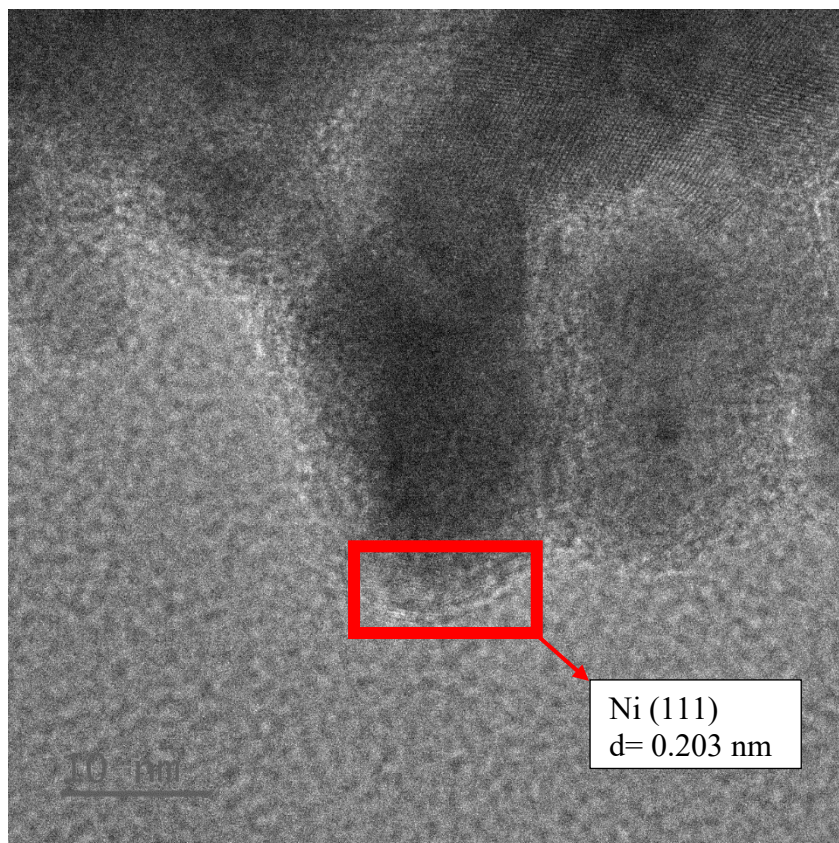

**Figure S4.** TEM image of the Ni/CeO<sub>2</sub>-7.7 catalyst.



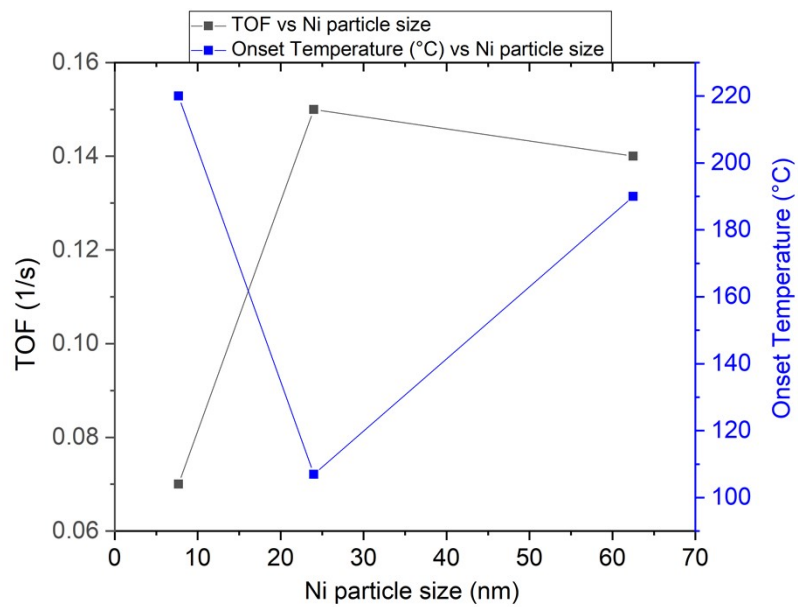

**Figure S5.** Onset temperature of reduction for Ni/CeO<sub>2</sub> catalysts.

## AgO calibration

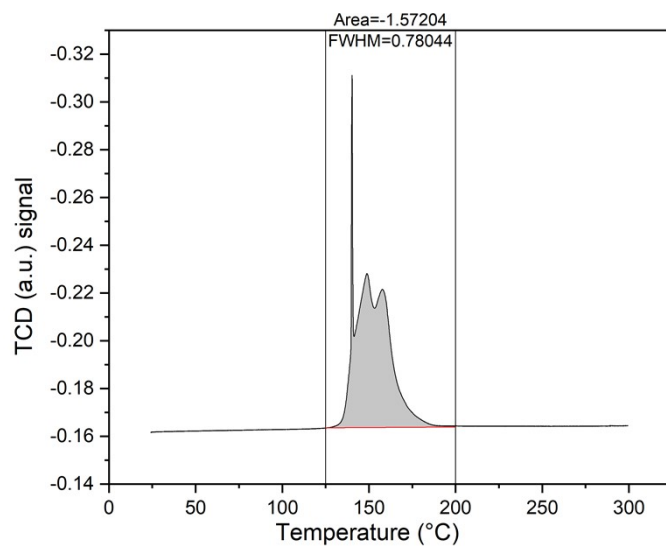

**Figure S6.** Standard AgO calibration H<sub>2</sub>-TPR.

### Calculation of standard AgO calibration

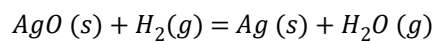

$$1 \text{ g AgO} \equiv 96.7 \text{ cm}^3 \text{ H}_2 \text{ (STP)}$$

We used 0.0395 g AgO in the calibration:

$$0.0395 \text{ g AgO} \equiv 3.818 \text{ cm}^3 \text{ H}_2$$

According to the experiment, 0.0395 g AgO  $\equiv$  1.57 TCD (a.u.) \* °C area  
so, 1.57 TCD (a.u.) \* °C area  $\equiv$  3.818 cm<sup>3</sup> H<sub>2</sub>

**Table S5.** H<sub>2</sub> consumption on pristine supports and Ni catalysts as determined by H<sub>2</sub> TPR and AgO calibration for Ni/TiO<sub>2</sub> (top) and Ni/CeO<sub>2</sub> (bottom).

**Ni/TiO<sub>2</sub> catalysts**

| Catalyst                          | Area (80-650 °C)<br>(a.u.* °C/ g of material) | Area (80-650 °C)<br>(a.u.* °C/ g of material) | Reduction range (80-650 °C)<br>(H <sub>2</sub> consumed cm <sup>3</sup> / g of material) | Reduction range (650-900 °C)<br>(H <sub>2</sub> consumed cm <sup>3</sup> / g of material) | Total H <sub>2</sub> consumption<br>(H <sub>2</sub> consumed cm <sup>3</sup> / g of material) |
|-----------------------------------|-----------------------------------------------|-----------------------------------------------|------------------------------------------------------------------------------------------|-------------------------------------------------------------------------------------------|-----------------------------------------------------------------------------------------------|
| TiO <sub>2</sub>                  | 1.14                                          | 3.36                                          | 2.78                                                                                     | 8.17                                                                                      | 10.95                                                                                         |
| Ni/TiO <sub>2</sub> - 2.9         | 7.81                                          | 0.92                                          | 18.98                                                                                    | 2.24                                                                                      | 21.22                                                                                         |
| Ni/TiO <sub>2</sub> - 9           | 4.91                                          | 0.19                                          | 12.41                                                                                    | 2.8                                                                                       | 15.21                                                                                         |
| Ni/TiO <sub>2</sub> - 11.2        | 7.02                                          | 2.87                                          | 17.07                                                                                    | 6.98                                                                                      | 24.05                                                                                         |
| Ni/TiO <sub>2</sub> - 27          | 4.06                                          | 1.33                                          | 9.87                                                                                     | 3.24                                                                                      | 13.11                                                                                         |
| Ni/TiO <sub>2</sub> SEA Unreduced | 14.81                                         | 1.57                                          | 35.99                                                                                    | 3.84                                                                                      | 39.74                                                                                         |

**Ni/CeO<sub>2</sub> catalysts**

| Catalyst                          | Area (100-550 °C)<br>(a.u.* °C/ g of material) | Area (550-900 °C)<br>(a.u.* °C/ g of material) | Reduction range (100-550 °C)<br>(H <sub>2</sub> consumed cm <sup>3</sup> / g of material) | Bulk CeO <sub>2</sub> reduction (550-900°C)<br>(H <sub>2</sub> consumed cm <sup>3</sup> / g of material) | Total H <sub>2</sub> consumption<br>(H <sub>2</sub> consumed cm <sup>3</sup> / g of material) |
|-----------------------------------|------------------------------------------------|------------------------------------------------|-------------------------------------------------------------------------------------------|----------------------------------------------------------------------------------------------------------|-----------------------------------------------------------------------------------------------|
| CeO <sub>2</sub>                  | -                                              | 11                                             | -                                                                                         | 26.73                                                                                                    | 26.73                                                                                         |
| Ni/CeO <sub>2</sub> -7.7          | 1.11                                           | 8.30                                           | 2.69                                                                                      | 20.17                                                                                                    | 22.86                                                                                         |
| Ni/CeO <sub>2</sub> - 24          | 1.23                                           | 9.74                                           | 2.99                                                                                      | 23.67                                                                                                    | 26.66                                                                                         |
| Ni/CeO <sub>2</sub> - 62.5        | 1.10                                           | 9.09                                           | 2.67                                                                                      | 22.08                                                                                                    | 24.75                                                                                         |
| Ni/CeO <sub>2</sub> SEA Unreduced | 6.27                                           | 10.57                                          | 15.23                                                                                     | 25.66                                                                                                    | 40.89                                                                                         |
| Ni/CeO <sub>2</sub> IWI Unreduced | 11.12                                          | 8.96                                           | 27.03                                                                                     | 21.77                                                                                                    | 48.8                                                                                          |

## Theoretical calculations for H<sub>2</sub> consumption during NiO reduction.

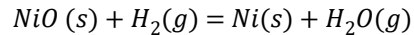

$$74.69 \text{ g NiO} = 22400 \text{ cm}^3 \text{H}_2$$

$$3 \text{ wt.}\% \text{ Ni} \equiv 0.0377 \frac{\text{g Ni}^{2+}}{\text{g of catalyst}}$$

$$\begin{aligned} \text{H}_2 \text{ needed for all NiO reduction} &= \frac{22400 \times 0.0377}{74.69} \frac{\text{cm}^3 \text{H}_2}{\text{g of catalyst}} \\ &= 11.3 \frac{\text{cm}^3 \text{H}_2}{\text{g of catalyst}} \end{aligned}$$

**Table S6.** Distribution of basic sites on pristine supports and Ni catalysts determined by CO<sub>2</sub> TPD<sup>a</sup>

| Materials                        | Weak + Medium basic sites area <sup>a</sup> | Strong basic sites area <sup>a</sup> | Total area | Weak + Medium basic sites (%) | Strong basic sites (%) |
|----------------------------------|---------------------------------------------|--------------------------------------|------------|-------------------------------|------------------------|
| <b>TiO<sub>2</sub></b>           | 10.15                                       | 1.65                                 | 11.8       | 86                            | 14                     |
| <b>Ni/TiO<sub>2</sub> - 2.9</b>  | 8.10                                        | 1.26                                 | 9.36       | 86.5                          | 13.5                   |
| <b>Ni/TiO<sub>2</sub> - 9</b>    | 7.31                                        | 1.83                                 | 9.14       | 80                            | 20                     |
| <b>Ni/TiO<sub>2</sub> - 11.2</b> | 9.63                                        | 3.06                                 | 12.69      | 75.9                          | 24.1                   |
| <b>Ni/TiO<sub>2</sub> - 27</b>   | 0.99                                        | 1.71                                 | 2.7        | 36.7                          | 63.3                   |
| <b>Only CeO<sub>2</sub></b>      | 1.12                                        | 0.61                                 | 1.73       | 64.7                          | 35.3                   |
| <b>Ni/CeO<sub>2</sub> - 7.7</b>  | 0.35                                        | 0.11                                 | 0.46       | 76                            | 24                     |
| <b>Ni/CeO<sub>2</sub> - 24</b>   | 0.39                                        | 0.37                                 | 0.76       | 51.3                          | 48.7                   |
| <b>Ni/CeO<sub>2</sub> - 62.5</b> | 0.47                                        | 0.83                                 | 1.3        | 36.2                          | 63.8                   |

<sup>a</sup> These basic site fractions were calculated from the peak area defined by 100-450 °C, and 450-900 °C, corresponding to the weak + medium, and strong basic sites, respectively, using a baseline of Y axis offset of left and right for each catalyst.

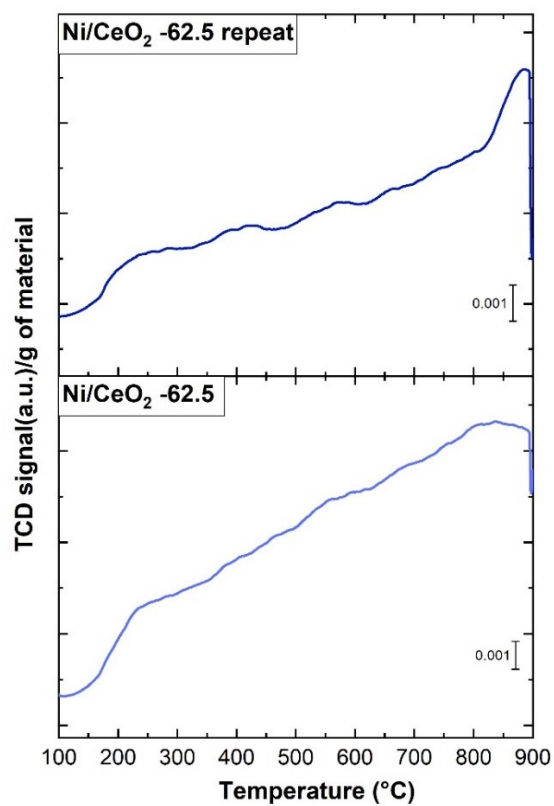

Figure S7. CO<sub>2</sub>-TPD repeat on Ni/CeO<sub>2</sub> -62.5

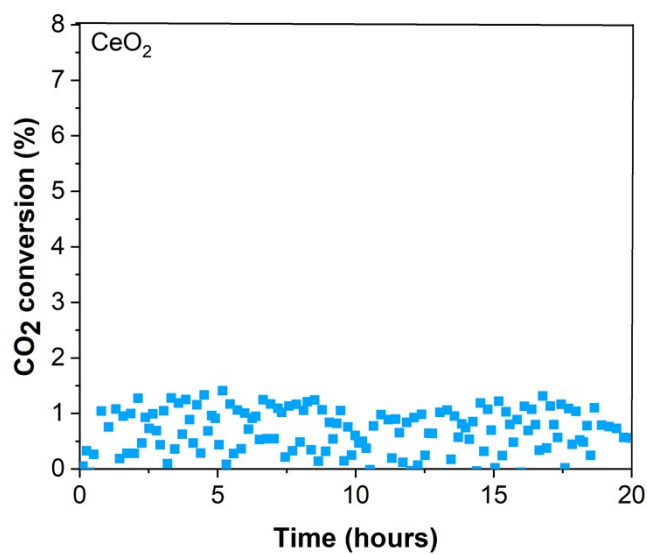

**Figure S8.** Reaction on CeO<sub>2</sub> only at 50 sccm and 300 °C. Pristine CeO<sub>2</sub> has a reactivity of 7 μmol/min/g of CeO<sub>2</sub> between 5 and 10 hrs.

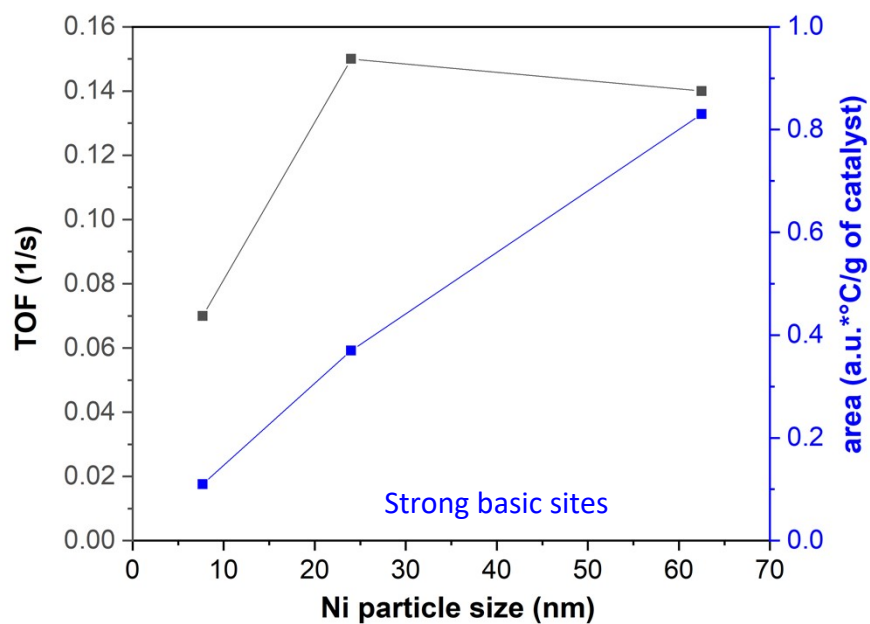

**Figure S9.** The CO<sub>2</sub> methanation turnover frequency (black) and area of strong basic sites (blue) from temperature programmed desorption on Ni/CeO<sub>2</sub> as a function of Ni particle size for the catalysts studied in this work.

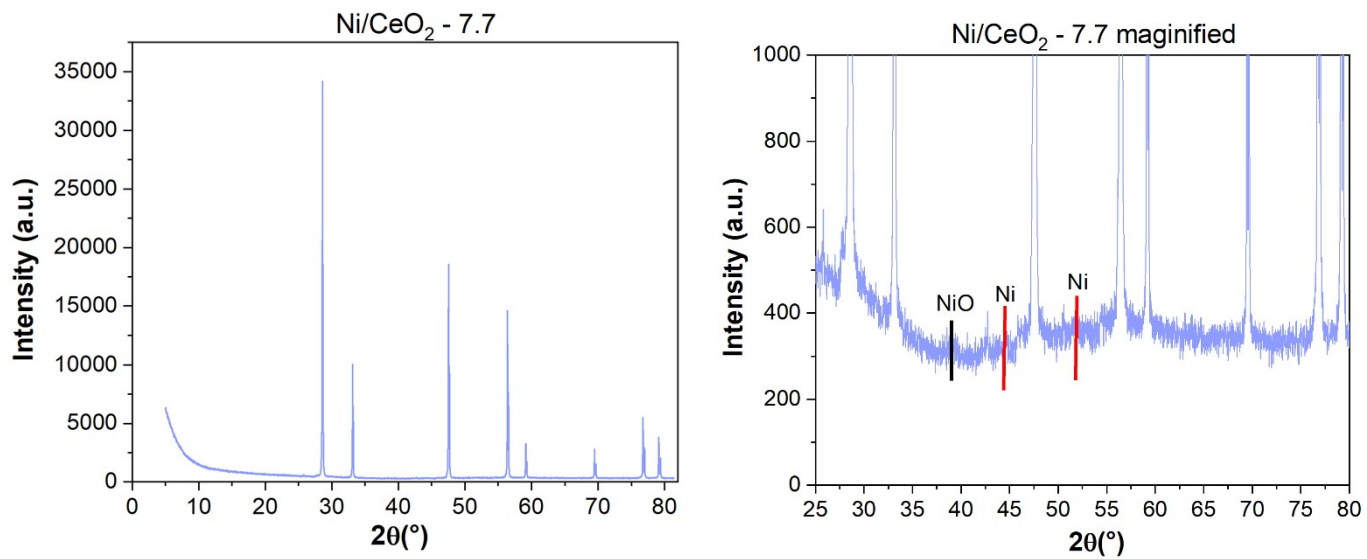

**Figure S10.** XRD patterns of the Ni/CeO<sub>2</sub>-7.7 catalyst.

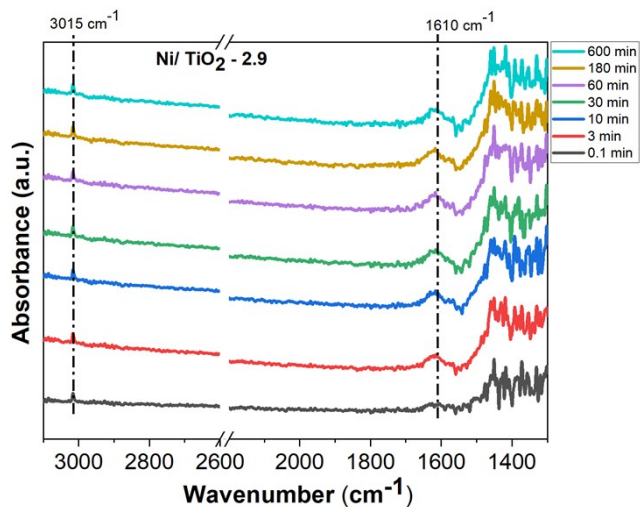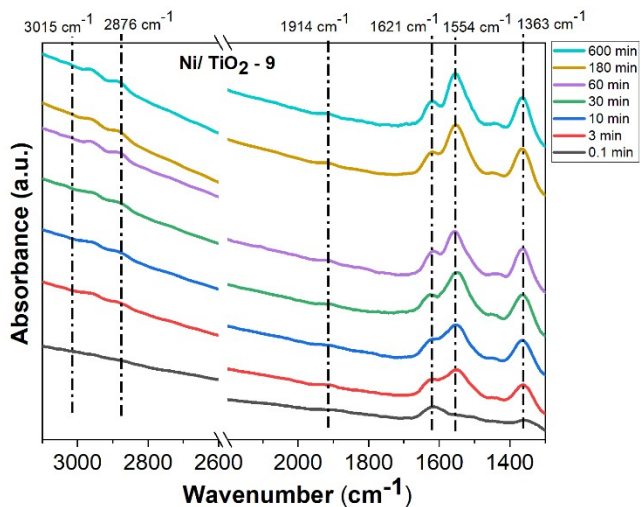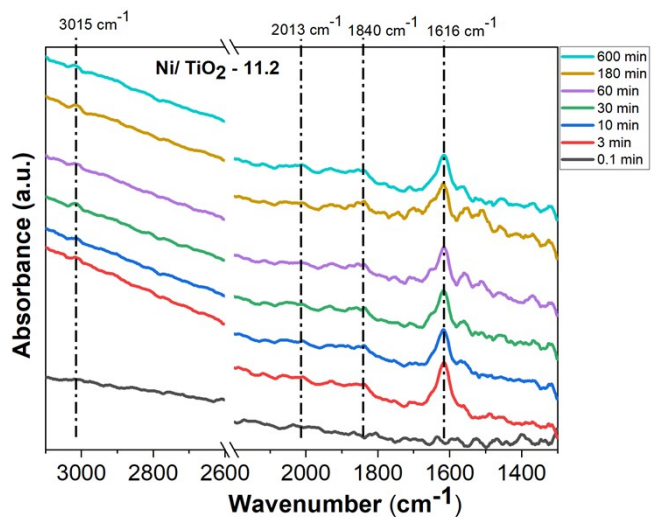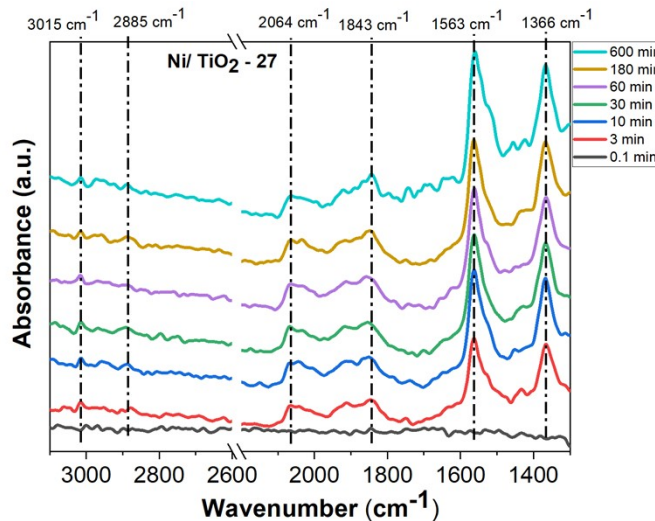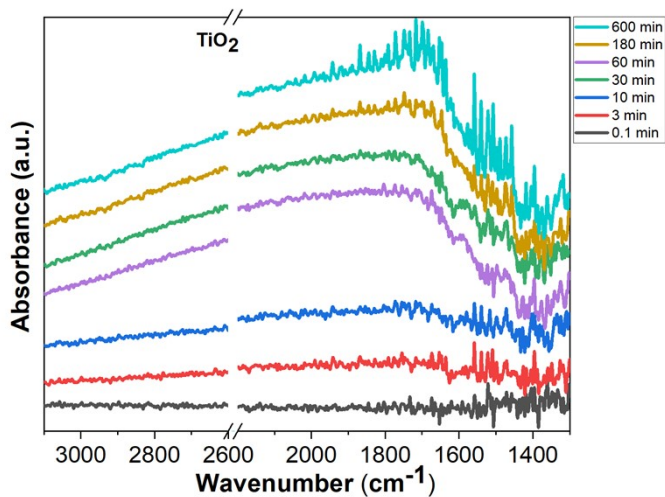



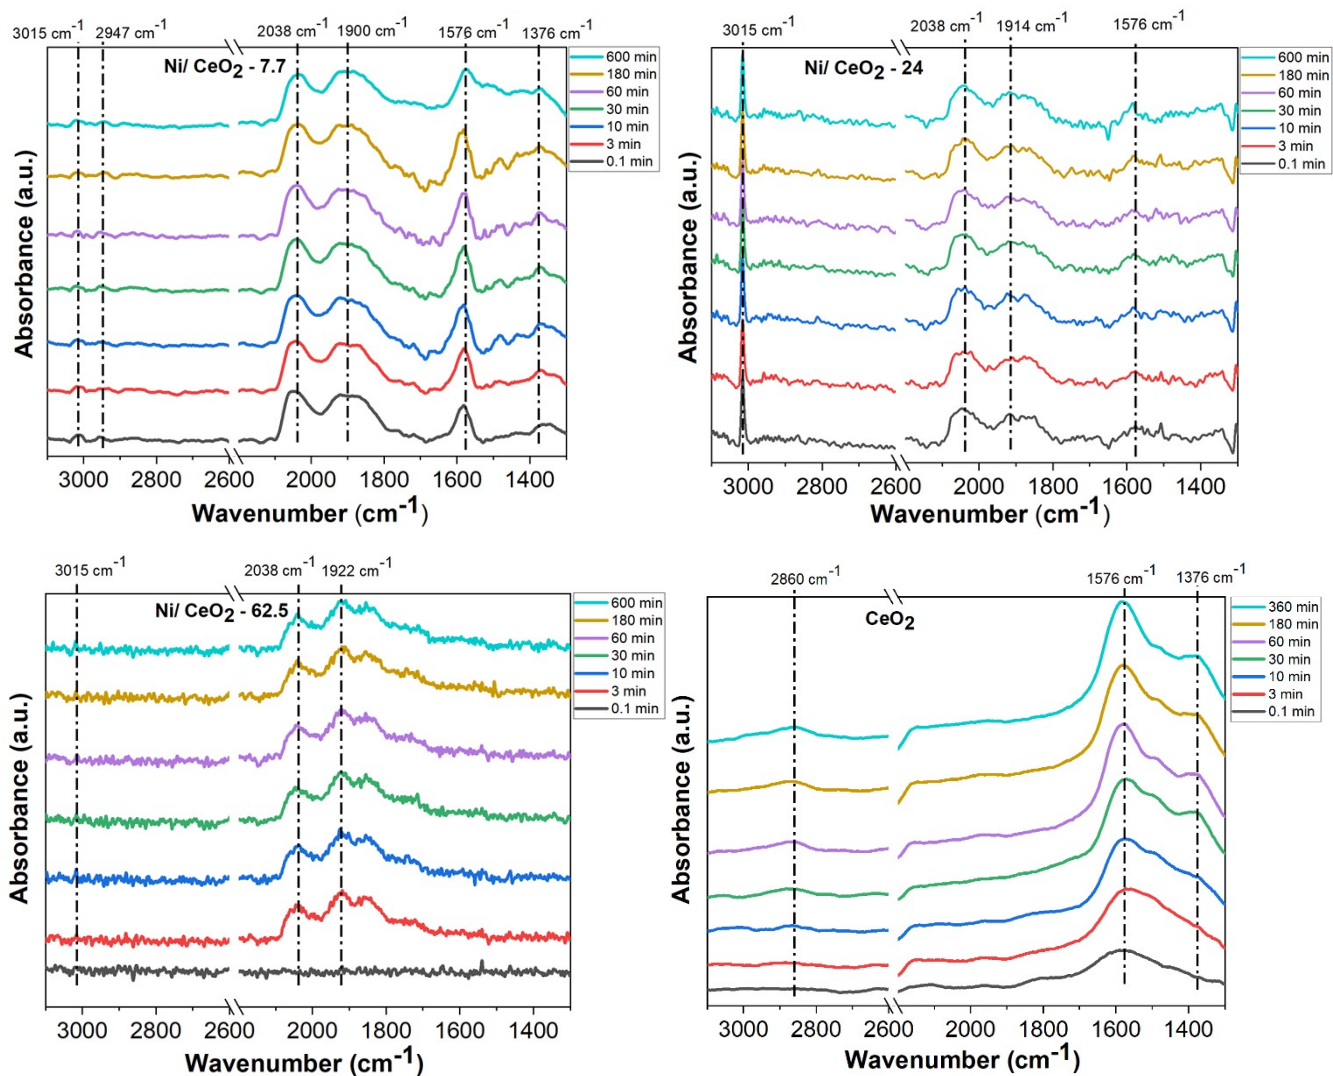

**Figure S11. Time lapse *in situ* FTIR on the catalysts and CeO<sub>2</sub> support studied in this work.** All catalysts were reduced *in situ* at 477 °C for 2 hrs prior to switching to the CO<sub>2</sub>, H<sub>2</sub>, Ar mixture at 300° C. The spectra shown were collected after 10 hrs. of reaction and a background of the reduced catalysts under H<sub>2</sub>/Ar flow is subtracted.

## Reference

- (1) Vannice, M. A. *Kinetics of Catalytic Reactions*; Springer US: Boston, MA, 2005.  
<https://doi.org/10.1007/b136380>.
